# Supplementary material for: Postnatal Serotonin Type 2 Receptor Blockade Prevents the Emergence of Anxiety Behavior, Dysregulated Stress-Induced Immediate Early Gene Responses, and Specific Transcriptional Changes that Arise Following Early Life Stress
Source: PubMed Central journal article supplement (PMC3210326; doi:10.1016/j.biopsych.2011.08.005), 2011-12-01
Supplement: mmc1.pdf [file mmc1.pdf]

**Postnatal 5-HT<sub>2</sub> receptor blockade prevents the emergence of anxiety behavior, dysregulated stress-induced immediate early gene responses and specific transcriptional changes that arise following early life stress**

*Supplemental Information*

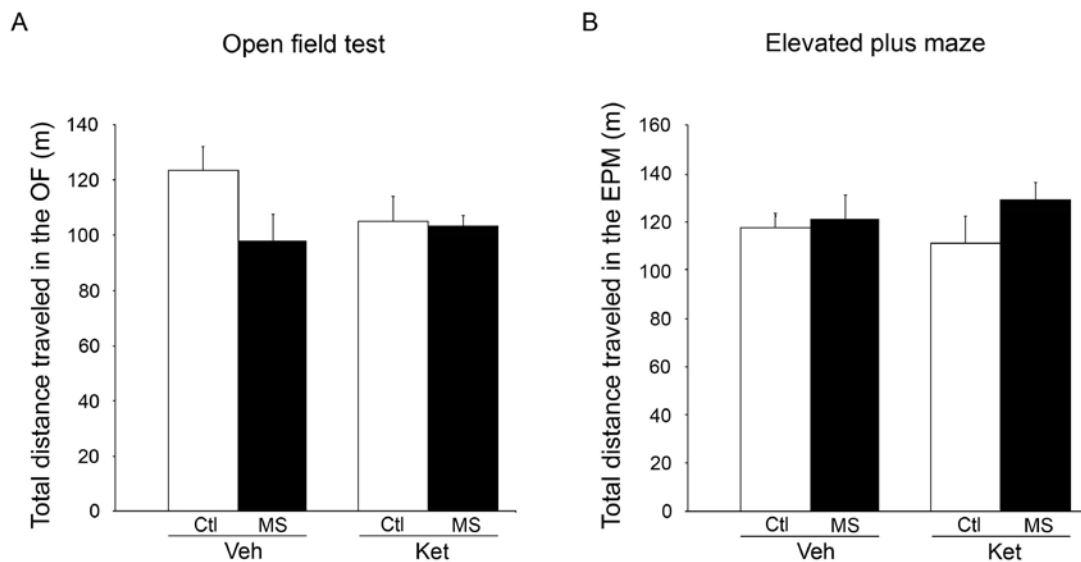

**Figure S1.** Postnatal treatment with the 5-HT<sub>2</sub> receptor antagonist ketanserin (Ket) in either control or maternal separation groups does not alter (A) the total distance traveled in the open field (OF) or (B) in the elevated plus maze (EPM) test. Shown are graphical representations of the total distance traversed by control (Ctl) and maternal separation (MS) groups administered vehicle (Veh) or Ket in early postnatal life when tested for anxiety behavior in adulthood on the open field test over a duration of 15 minutes and in the elevated plus maze over a duration of 30 minutes. The results are expressed as the mean  $\pm$  SEM total distance traveled in the open field or the elevated plus maze ( $n = 4-7$ /group).

**Table S1.** List of TaqMan assays used for quantitative polymerase chain reaction (qPCR). Shown in the table is the list of TaqMan assays used for qPCR validation of microarray results.

| <b>TaqMan Assay ID</b> | <b>Gene Symbol</b> | <b>Gene Name</b>                                                |
|------------------------|--------------------|-----------------------------------------------------------------|
| Hs99999901_s1          | <i>18S</i>         | 18 s RNA                                                        |
| Rn00667869_m1          | <i>Actb</i>        | beta actin                                                      |
| Rn99999916_s1          | <i>Gapdh</i>       | glyceraldehyde-3-phosphate dehydrogenase                        |
| Rn00575638_m1          | <i>Grin2d</i>      | glutamate receptor, ionotropic, <i>N</i> -methyl D-aspartate 2D |
| Rn01527840_m1          | <i>Hprt1</i>       | hypoxanthine-guanine phosphoribosyl transferase 1               |
| Rn00587892_m1          | <i>Nlgn1</i>       | neuroligin 1                                                    |
| Rn00589857_m1          | <i>Plcd4</i>       | phospholipase C, delta 4                                        |
| Rn01429661_m1          | <i>Plek</i>        | pleckstrin                                                      |
| Rn00566855_m1          | <i>Ppp3ca</i>      | protein phosphatase 3, catalytic subunit, alpha isoform         |
| Rn00562312_m1          | <i>Prkcb1</i>      | protein kinase C, beta 1                                        |
